# Supplementary material
Source: PubMed Central journal article supplement (PMC7984727)
Supplement: NIHMS1673060-supplement-Supplemental_appendiz.pdf [file NIHMS1673060-supplement-Supplemental_appendiz.pdf]

## Supplementary appendix

The authors' full names and academic degrees are as follows: Manish R Patel, MD; John Ellerton, MD; Jeffrey R Infante, MD; Manish Agrawal, MD; Michael Gordon, MD; Raid Aljumaily, MD; Carolyn D Britten, MD; Luc Dirix, MD; Keun-Wook Lee, MD; Mathew Taylor, MD; Patrick Schöffski, MD; Ding Wang, MD; Alain Ravaud, MD; Arnold B Gelb, MD; Junyuan Xiong; Galit Rosen, MD; James L Gulley, MD; Andrea B Apolo, MD

The authors' affiliations are as follows: Florida Cancer Specialists/Sarah Cannon Research Institute, Sarasota, FL (MRP); Nevada Cancer Research Foundation, Las Vegas, NV (JE); Sarah Cannon Research Institute/Tennessee Oncology, Nashville, TN (JRI); Associates in Oncology, Rockville, MD (MA); Pinnacle Oncology Hematology, A Division of Arizona Center for Cancer Care, HonorHealth Research Institute Clinical Trials Program at the Virginia G. Piper Cancer Center, University of Arizona College of Medicine, Phoenix, Scottsdale, Arizona (MG); Oklahoma University Medical Center, Oklahoma City, OK (RA); Medical University of South Carolina, Division of Hematology/Oncology, Charleston, SC (CDB); Sint-Augustinus Hospital, Oncology Center, Medical Oncology, Antwerpen, Belgium (LC); Seoul National University Bundang Hospital, Seoul National University College of Medicine, Seongnam, South Korea (K-WL); Oregon Health & Science University, Knight Cancer Institute, Portland, OR (MT); Department of General Medical Oncology, Leuven Cancer Institute, University Hospitals Leuven, Leuven, Belgium (PS); Henry Ford Hospital, Detroit, MI (DW); Groupe Hospitalier Saint André, Hôpital Saint André, CHU de Bordeaux, Bordeaux Cedex, France (AR); EMD Serono Research & Development Institute, Inc, Billerica, MA (AG, JX, GR); Genitourinary Malignancies Branch, National Cancer Institute, National Institutes of Health, Bethesda, MD, USA, and Laboratory of Tumor Immunology and Biology, Center for Cancer Research, National Cancer Institute, National Institutes of Health, Bethesda, MD, USA (JLG); Genitourinary Malignancies Branch, Center for Cancer Research, National Cancer Institute, Magnuson Clinical Center, Bethesda, MD (ABA)

**Corresponding author:** Andrea B. Apolo, MD; Genitourinary Malignancies Branch, Center for Cancer Research, National Cancer Institute, Bethesda, MD 20892, USA;  
Phone: +1-301-480-0536; email: andrea.apolo@nih.gov

## Table of contents

|                                                                       |         |
|-----------------------------------------------------------------------|---------|
| Table S1. Investigator sites                                          | Page 3  |
| Table S2. Eligibility criteria for trial enrolment                    | Page 5  |
| Table S3. Reasons for discontinuation or delay of avelumab treatment  | Page 6  |
| Table S4. Additional patient demographics and disease characteristics | Page 7  |
| Table S5. Prior anticancer therapies                                  | Page 8  |
| Table S6. Overall summary of safety                                   | Page 10 |

Appendix tables

**Table S1. Investigator sites**

| <b>Site number</b> | <b>Principal investigator</b> | <b>Site/Institution</b>                                           | <b>Patients treated (N=249)</b> |
|--------------------|-------------------------------|-------------------------------------------------------------------|---------------------------------|
| 141                | Patel, Manish                 | Florida Cancer Specialists                                        | 13                              |
| 102                | Infante, Jeffrey              | SCRI - Tennessee Oncology                                         | 10                              |
| 169                | Ellerton, John                | Southern Nevada Cancer Research Foundation                        | 9                               |
| 120                | Gordon, Michael               | Pinnacle Oncology Hematology                                      | 8                               |
| 124                | Agrawal, Manish               | Maryland Oncology Hematology, P.A.                                | 7                               |
| 193                | Taylor, Matthew               | Oregon Health & Science University                                | 6                               |
| 221                | Dirix, Luc                    | GZA Ziekenhuizen - Campus Sint-Augustinus                         | 6                               |
| 112                | Aljumaily, Raid               | Oklahoma University Medical Center                                | 6                               |
| 904                | Lee, Keun-wook                | Seoul National University Bundang Hospital                        | 6                               |
| 165                | Britten, Carolyn              | Medical University of South Carolina                              | 6                               |
| 402                | Delord, Jean-Pierre           | Institut Claudius Regaud-Oncopole                                 | 5                               |
| 223                | Schoffski, Patrick            | UZ Leuven                                                         | 5                               |
| 202                | Verschraegen, Claire          | University of Vermont Medical Center                              | 5                               |
| 406                | Kotecki, Nuria                | Centre Oscar Lambret                                              | 5                               |
| 167                | Wang, Ding                    | Henry Ford Medical Center                                         | 5                               |
| 176                | Belani, Chandra               | Penn State Univ. Milton S. Hershey Medical Center                 | 5                               |
| 225                | Forget, Frédéric              | Centre Hospitalier de l'Ardenne                                   | 4                               |
| 107                | Kelly, Karen                  | University of California Davis Health System                      | 4                               |
| 407                | Isambert, Nicolas             | Centre Georges François Leclerc                                   | 4                               |
| 156                | Kochuparambil, Samith         | Virginia Piper Cancer Institute                                   | 4                               |
| 209                | Hamid, Omid                   | The Angeles Clinic and Research Institute - West LA               | 4                               |
| 159                | Safran, Howard                | Rhode Island Hospital                                             | 4                               |
| 405                | Ravaud, Alain                 | Groupe Hospitalier Saint André - Hôpital Saint André              | 4                               |
| 171                | Peguero, Julio                | Oncology Consultants, P.A.                                        | 4                               |
| 805                | Arkenau, Hendrik-Tobias       | Sarah Cannon Research Institute UK                                | 4                               |
| 101                | Gulley, James                 | National Cancer Institute                                         | 4                               |
| 152                | Powderly, John                | Carolina BioOncology Institute, LLC                               | 4                               |
| 222                | Jerusalem, Guy                | CHU Sart Tilman                                                   | 3                               |
| 502                | Folprecht, Gunnar             | Universitaetsklinikum Carl Gustav Carus TU Dresden                | 3                               |
| 145                | Khleif, Samir                 | Augusta University                                                | 3                               |
| 179                | Frank, Richard                | Whittingham Cancer Center                                         | 3                               |
| 139                | Lenz, Heinz                   | Keck School of Medicine of USC                                    | 3                               |
| 184                | Vaishampayan, Ulka            | Karmanos Cancer Institute                                         | 3                               |
| 166                | Wong, Deborah                 | UCLA Department of Medicine                                       | 3                               |
| 135                | Morris, John                  | UC Health Clinical Trials Office                                  | 3                               |
| 404                | Le Tourneau, Christophe       | Institut Curie - Centre de Lutte Contre le Cancer (CLCC) de Paris | 3                               |
| 204                | Mehnert, Janice               | Rutgers Cancer Institute of New Jersey                            | 3                               |
| 157                | Assikis, Vasileios            | Peachtree Hematology-Oncology Consultants, P.C.                   | 3                               |
| 117                | Redfern, Charles              | Sharp Memorial Hospital                                           | 3                               |
| 172                | MacVicar, Gary                | Illinois Cancer Care, P.C.                                        | 3                               |
| 164                | Neidhart, Jeffrey             | San Juan Oncology Associates                                      | 2                               |
| 412                | Lesimple, Thierry             | CRLCC Eugene Marquis                                              | 2                               |
| 108                | Smith, Pamela                 | Billings Clinic Cancer Center                                     | 2                               |
| 149                | Villa, Luis                   | AMPM Research Clinic                                              | 2                               |
| 161                | Lee, Carrie                   | University of North Carolina at Chapel Hill                       | 2                               |
| 908                | Kim, Yeul Hong                | Korea University Anam Hospital                                    | 2                               |
| 148                | Boccia, Ralph                 | RCCA MD LLC                                                       | 2                               |
| 303                | Smakal, Martin                | Nemocnice Rudolfa a Stefanie Benesov, a.s.                        | 2                               |
| 411                | Borel, Christian              | Centre Paul Strauss                                               | 2                               |
| 308                | Zemanova, Milada              | Vseobecna fakultni nemocnice V Praze                              | 2                               |
| 501                | Keilholz, Ulrich              | Charite Universitaetsmedizin Berlin - Campus Benjamin Franklin    | 2                               |
| 906                | Chung, Hyun Cheol             | Severance Hospital, Yonsei University                             | 2                               |

|     |                     |                                                                        |   |
|-----|---------------------|------------------------------------------------------------------------|---|
| 506 | Claus, Rainer       | Universitaetsklinikum Freiburg                                         | 2 |
| 208 | Chandler, Jason     | The West Clinic                                                        | 2 |
| 180 | Gelmann, Edward     | Columbia University College of Phys & Surgeons                         | 2 |
| 118 | Zarwan, Corrine     | Lahey Clinic Inc.                                                      | 2 |
| 116 | Chaves, Jorge       | Northwest Medical Specialties, PLLC                                    | 2 |
| 207 | Segota, Zdenka      | Holy Cross Hospital                                                    | 2 |
| 186 | Mita, Alain         | Cedars-Sinai Medical Center                                            | 2 |
| 188 | Nemunaitis, John    | Mary Crowley Cancer Research Centers                                   | 1 |
| 213 | Dreisbach, Luke     | Desert Hematology Oncology Medical Group, Inc.                         | 1 |
| 155 | Gurtler, Jayne      | Metairie Oncologist, LLC                                               | 1 |
| 306 | Prausova, Jana      | Fakultni nemocnice v Motole                                            | 1 |
| 162 | Edenfield, William  | Greenville Hospital System University Medical Center (ITOR)            | 1 |
| 307 | Melichar, Bohuslav  | Fakultni nemocnice Olomouc                                             | 1 |
| 224 | Rolfo, Christian    | UZ Antwerpen                                                           | 1 |
| 199 | Rubenstein, Stephen | Franciscan St. Francis Health Cancer Center                            | 1 |
| 198 | Papish, Steven      | Morristown Medical Center                                              | 1 |
| 173 | Lee, Wes            | St Joseph Heritage Healthcare                                          | 1 |
| 218 | Nimeiri, Halla      | Robert H. Lurie Comprehensive Cancer Center of Northwestern University | 1 |
| 113 | Goel, Sanjay        | Montefiore Medical Center                                              | 1 |
| 187 | Nakka, Sushma       | Lakeland Regional Cancer Center                                        | 1 |
| 119 | Freilich, Bradley   | Kansas City Research Institute, LLC                                    | 1 |
| 902 | Lee, Jeeyun         | Samsung Medical Center                                                 | 1 |
| 115 | Beck, Joseph        | Highlands Oncology Group                                               | 1 |
| 905 | Roh, Sang-Young     | The Catholic University of Korea, Seoul St. Mary's Hospital            | 1 |
| 122 | Iannotti, Nicholas  | Hematology - Oncology Associates of Treasure Coast                     | 1 |
| 301 | Obermannova, Radka  | Masarykuv onkologicky ustav                                            | 1 |
| 408 | Bourgeois, Hugues   | Clinique Victor Hugo - Centre Jean Bernard                             | 1 |
| 210 | McClay, Edward      | California Cancer Associates for Research & Excellence, Inc.           | 1 |

**Table S2: Eligibility Criteria for Trial Enrolment**

| Inclusion criteria                                                                                                                                                                                                                                                                                                                                                                                                                                                                                                                                                                                                                                                                                                                                                                                                                                                                                                                                                                                                                                                                                                                                                                                                                                                                                                                                                                                                                                                                                                                                                                                                                                                                                                                                                                                                                                                                                                                                                                                                                                                                                                                                                                                      | Exclusion criteria                                                                                                                                                                                                                                                                                                                                                                                                                                                                                                                                                                                                                                                                                                                                                                                                                                                                                                                                                                                                                                                                                                                                                                                                                                                                                                                                                                                                                                                                                                                                                                                                                                                                                                                                                                                                                                                                                                                                                                                                                                                                                                                                                                                                                                                                                                         |
|---------------------------------------------------------------------------------------------------------------------------------------------------------------------------------------------------------------------------------------------------------------------------------------------------------------------------------------------------------------------------------------------------------------------------------------------------------------------------------------------------------------------------------------------------------------------------------------------------------------------------------------------------------------------------------------------------------------------------------------------------------------------------------------------------------------------------------------------------------------------------------------------------------------------------------------------------------------------------------------------------------------------------------------------------------------------------------------------------------------------------------------------------------------------------------------------------------------------------------------------------------------------------------------------------------------------------------------------------------------------------------------------------------------------------------------------------------------------------------------------------------------------------------------------------------------------------------------------------------------------------------------------------------------------------------------------------------------------------------------------------------------------------------------------------------------------------------------------------------------------------------------------------------------------------------------------------------------------------------------------------------------------------------------------------------------------------------------------------------------------------------------------------------------------------------------------------------|----------------------------------------------------------------------------------------------------------------------------------------------------------------------------------------------------------------------------------------------------------------------------------------------------------------------------------------------------------------------------------------------------------------------------------------------------------------------------------------------------------------------------------------------------------------------------------------------------------------------------------------------------------------------------------------------------------------------------------------------------------------------------------------------------------------------------------------------------------------------------------------------------------------------------------------------------------------------------------------------------------------------------------------------------------------------------------------------------------------------------------------------------------------------------------------------------------------------------------------------------------------------------------------------------------------------------------------------------------------------------------------------------------------------------------------------------------------------------------------------------------------------------------------------------------------------------------------------------------------------------------------------------------------------------------------------------------------------------------------------------------------------------------------------------------------------------------------------------------------------------------------------------------------------------------------------------------------------------------------------------------------------------------------------------------------------------------------------------------------------------------------------------------------------------------------------------------------------------------------------------------------------------------------------------------------------------|
| <ul style="list-style-type: none"> <li>• Signed and written informed consent</li> <li>• Age <math>\geq 18</math> years with estimated life expectancy <math>\geq 3</math> months</li> <li>• Histologically confirmed locally advanced or metastatic transitional cell carcinoma of the urothelium (including renal pelvis, ureters, urinary bladder, urethra)</li> <li>• Eligible patients must have either:               <ul style="list-style-type: none"> <li>○ Progressed after treatment with <math>\geq 1</math> platinum-containing regimen (i.e., platinum plus another agent such as gemcitabine, methotrexate, vinblastine, doxorubicin) for inoperable locally advanced or metastatic urothelial carcinoma or disease recurrence, <i>or</i></li> <li>○ Been ineligible for cisplatin-based chemotherapy, with ineligibility to a platinum salt defined by any impaired renal function, a hearing loss of 25 decibels at two contiguous frequencies, or grade <math>\geq 2</math> peripheral neuropathy</li> </ul> </li> <li>• Biopsy material was required (archival tissue was acceptable if patient could not provide fresh or recent biopsy)</li> <li>• ECOG PS of 0 to 1 at study entry</li> <li>• <math>\geq 1</math> unidimensional measurable lesion by RECIST v 1.1</li> <li>• Adequate haematologic function defined by white blood cell count <math>\geq 3 \times 10^9/L</math> with absolute neutrophil count <math>\geq 1.5 \times 10^9/L</math>, lymphocyte count <math>\geq 0.5 \times 10^9/L</math>, platelet count <math>\geq 100 \times 10^9/L</math>, and haemoglobin <math>\geq 9</math> g/dL (may have been transfused)</li> <li>• Adequate hepatic function defined by a total bilirubin level <math>\leq 1.5 \times ULN</math>, an AST level <math>\leq 2.5 \times ULN</math>, and an ALT level <math>\leq 2.5 \times ULN</math> or, for patients with documented metastatic disease to the liver, AST and ALT levels <math>\leq 5 \times ULN</math></li> <li>• Adequate renal function defined by an estimated creatinine clearance <math>&gt; 50</math> mL/min according to the Cockcroft-Gault formula</li> <li>• Use of highly effective contraception</li> </ul> | <ul style="list-style-type: none"> <li>• Concurrent treatment with an anticancer treatment (within 28 days) or other non-permitted drug</li> <li>• Prior therapy with any drug targeting T-cell coregulatory proteins</li> <li>• Concurrent systemic therapy with corticosteroids or other immunosuppressive agents, or use of any investigational drug within 28 days before starting trial drug; short-term administration of systemic steroids (steroids with no or minimal systemic effect were allowed); any prior surgery for any reason within 4 weeks or if the patient had not fully recovered within 4 weeks</li> <li>• Previous malignant disease (other than urothelial carcinoma) within the last 5 years, with the exclusion of basal or squamous cell carcinoma of the skin or cervical carcinoma in situ</li> <li>• Rapidly progressive disease (eg, tumour lysis syndrome)</li> <li>• Active or history of central nervous metastasis</li> <li>• Known history of testing positive for HIV/AIDS, HBV, or HCV (including acute and chronic infection)</li> <li>• Known monoclonal antibody hypersensitivity, history of anaphylaxis, or uncontrolled asthma</li> <li>• Persisting toxicity related to prior therapy that was grade <math>&gt; 1</math> according to NCI-CTCAE v4.0 (grade <math>\leq 2</math> sensory neuropathy was acceptable)</li> <li>• Prior organ transplantation, including allogeneic stem-cell transplantation</li> <li>• Active or history of any autoimmune disease or immune-deficiencies (patients with type 1 diabetes, vitiligo, psoriasis, hypo- or hyperthyroid disease not requiring immunosuppressive treatment were eligible)</li> <li>• Pregnancy or lactation</li> <li>• Known alcohol or drug use</li> <li>• Clinically significant cardiovascular disease</li> <li>• All other significant diseases that, in the investigator's opinion, may have influenced the patient's tolerance of trial treatment</li> <li>• Legal incapacity or limited legal capacity, including any psychiatric condition that would prohibit the understanding or rendering of informed consent</li> <li>• Vaccination within 4 weeks of the first dose of avelumab and while on study except for administration of inactivated vaccines (eg, inactivated influenza vaccines)</li> </ul> |

ALT=alanine aminotransferase. AST=aspartate aminotransferase. ECOG PS=Eastern Cooperative Oncology Group performance status. HBV=hepatitis B virus. HCV=hepatitis C virus. HIV=human immunodeficiency virus. NCI-CTCAE=National Cancer Institute Common Terminology Criteria for Adverse Events. RECIST=Response Evaluation Criteria In Solid Tumors. ULN=upper limit of normal.

**Table S3: Reasons for Avelumab Treatment Discontinuation or Delay**

---

**Permanent treatment discontinuation**

- Any grade 4 adverse events required treatment discontinuation except for single laboratory values out of normal range that were unrelated to trial treatment per investigator, did not have clinical correlates, and resolved within 7 days with adequate medical intervention
- Any grade 3 adverse events required treatment discontinuation, other than the following:
  - Transient ( $\leq 6$  hours) grade 3 flu-like symptoms or fever controlled with medical intervention
  - Transient ( $\leq 24$  hours) grade 3 fatigue, local reactions, headache, nausea, or emesis resolving to grade  $\leq 1$
  - Single laboratory values out of normal range (excluding grade  $\geq 3$  liver function test increase) that were unrelated to trial treatment per investigator, had no clinical correlates, and resolved to grade  $\leq 1$  within 7 days with adequate medical management
  - Tumour flare event (eg. local pain, irritation, or rash) localised at sites of known or suspected tumour
  - Any grade  $\geq 3$  drug-related amylase or lipase abnormality that was not associated with symptoms or clinical manifestations of pancreatitis that did not require dose delay
  - Increased ECOG PS  $\geq 3$  (did not resolve to  $\leq 2$  by cycle day 14 of the following cycle); infusion was not given on the following cycle if the ECOG PS was  $\geq 3$  on the day of study drug administration

**Management of grade 2 adverse events**

- Treatment was continued if a grade 2 adverse event resolved to grade  $\leq 1$  by the last day of the current cycle
- If there was no resolution of a grade 2 adverse event by the last day of the current cycle, infusions were not given the following cycle.
  - If at the end of the following cycle, the event had not resolved to grade 1, the patient permanently discontinued treatment (excluding hormone insufficiencies managed by replacement therapy; for these hormone insufficiencies, up to two subsequent doses were omitted)
- Treatment with avelumab was permanently discontinued following the second occurrence of the same grade 2 adverse event (excluding hormone insufficiencies that were managed by replacement therapy) in the same patient
- Infusion-related reactions, hypersensitivity reactions (grades 1–4), and tumour lysis syndrome were handled based on protocol guidelines

---

ECOG PS=Eastern Cooperative Oncology Group performance status.

**Table S4: Additional Patient Demographics and Disease Characteristics**

| <b>Characteristics</b>                                     | <b>N=249</b> |
|------------------------------------------------------------|--------------|
| <b>Prior surgery</b>                                       | 237 (95%)    |
| <b>Prior radiotherapy</b>                                  | 76 (31%)     |
| <b>Prior drug therapy</b>                                  | 243 (98%)    |
| <b>Number of prior anticancer therapies in any setting</b> |              |
| <b>1</b>                                                   | 81 (33%)     |
| <b>2</b>                                                   | 80 (32%)     |
| <b>≥3</b>                                                  | 82 (33%)     |
| <b>Unknown</b>                                             | 6 (2%)       |
| <b>Median</b>                                              | 2·0 (1–3)    |
| <b>Prior platinum regimen</b>                              |              |
| <b>Cisplatin-based</b>                                     | 159 (64%)    |
| <b>Carboplatin-based</b>                                   | 129 (52%)    |
| <b>Type of prior anticancer therapy</b>                    |              |
| <b>Chemotherapy</b>                                        | 243 (98%)    |
| <b>Hormonal therapy</b>                                    | 2 (1%)       |
| <b>Antibody therapy</b>                                    | 3 (1%)       |
| <b>Kinase inhibitor</b>                                    | 2 (1%)       |
| <b>Vaccines</b>                                            | 5 (2%)       |
| <b>Other</b>                                               | 24 (10%)     |
| <b>Intent of any prior therapy</b>                         |              |
| <b>Neoadjuvant</b>                                         | 34 (14%)     |
| <b>Adjuvant</b>                                            | 51 (21%)     |
| <b>Metastatic</b>                                          | 221 (89%)    |
| <b>Locally advanced</b>                                    | 37 (15%)     |

Data are median (interquartile range), and n (%).



**Table S5: Prior Anticancer Therapies**

| <b>Patients receiving prior anticancer therapy</b> | <b>N=249</b> |
|----------------------------------------------------|--------------|
| Gemcitabine                                        | 159 (64%)    |
| Cisplatin                                          | 153 (61%)    |
| Carboplatin                                        | 122 (49%)    |
| Paclitaxel                                         | 64 (26%)     |
| Gemcitabine hydrochloride                          | 59 (24%)     |
| Methotrexate                                       | 44 (18%)     |
| Vinblastine                                        | 39 (16%)     |
| Doxorubicin                                        | 38 (15%)     |
| Bacillus Calmette-Guérin vaccine                   | 36 (15%)     |
| Docetaxel                                          | 22 (9%)      |
| Mitomycin                                          | 19 (8%)      |
| Investigational drug                               | 12 (5%)      |
| Pemetrexed                                         | 10 (4%)      |
| Pemetrexed disodium                                | 10 (4%)      |
| Vinblastine sulfate                                | 7 (3%)       |
| Vinflunine                                         | 6 (2%)       |
| Carboplatin with gemcitabine                       | 5 (2%)       |
| Combinations of antineoplastic agents              | 5 (2%)       |
| Bevacizumab                                        | 4 (2%)       |
| Etoposide                                          | 4 (2%)       |
| Vinorelbine                                        | 4 (2%)       |
| Antineoplastic agents                              | 3 (1%)       |
| Cabozantinib                                       | 3 (1%)       |
| Capecitabine                                       | 3 (1%)       |
| Cisplatin with gemcitabine                         | 3 (1%)       |
| Cisplatin with gemcitabine hydrochloride           | 3 (1%)       |
| Doxorubicin hydrochloride                          | 3 (1%)       |
| Fluorouracil                                       | 3 (1%)       |
| Ifosfamide                                         | 3 (1%)       |
| Paclitaxel albumin                                 | 3 (1%)       |
| Azacitidine                                        | 2 (1%)       |
| Carboplatin with paclitaxel                        | 2 (1%)       |
| Everolimus                                         | 2 (1%)       |
| Valrubicin                                         | 2 (1%)       |
| Amrubicin                                          | 1 (<1%)      |
| Epirubicin                                         | 1 (<1%)      |
| Epirubicin hydrochloride                           | 1 (<1%)      |
| Eribulin                                           | 1 (<1%)      |
| FOLFOX                                             | 1 (<1%)      |
| Idarubicin hydrochloride                           | 1 (<1%)      |
| Irinotecan                                         | 1 (<1%)      |

|                         |         |
|-------------------------|---------|
| Lapatinib               | 1 (<1%) |
| Pazopanib               | 1 (<1%) |
| Pertuzumab              | 1 (<1%) |
| Pyrimidine analogues    | 1 (<1%) |
| Ramucirumab             | 1 (<1%) |
| Sorafenib               | 1 (<1%) |
| Thiotepa                | 1 (<1%) |
| Topotecan hydrochloride | 1 (<1%) |
| Trastuzumab             | 1 (<1%) |
| Vincristine             | 1 (<1%) |
| Vinflunine ditartrate   | 1 (<1%) |

Data are n (%). FOLFOX=fluorouracil, leucovorin, oxaliplatin.

**Table S6: Overall summary of safety**

| <b>Patients with AEs</b>                                                | <b>N=249</b> |
|-------------------------------------------------------------------------|--------------|
| Any AE                                                                  | 244 (98%)    |
| Any treatment-related AE                                                | 166 (67%)    |
| Any grade $\geq 3$ AE                                                   | 154 (62%)    |
| Any treatment-related grade $\geq 3$ AE                                 | 21 (8%)      |
| Any serious AE                                                          | 117 (47%)    |
| Any treatment-related serious AE                                        | 19 (8%)      |
| Any AE leading to permanent treatment discontinuation                   | 40 (16%)     |
| Any treatment-related AE leading to permanent treatment discontinuation | 14 (6%)      |
| Any AE leading to death                                                 | 46 (19%)     |
| Any treatment-related AE leading to death                               | 1 (<1%)      |
| Any immune-mediated AE                                                  | 34 (14%)     |
| Any treatment-related immune-mediated AE                                | 29 (12%)     |

Data are n (%) or % (95% CI). AE=adverse event.
